# Supplementary material
Source: PubMed Central journal article supplement (PMC9042856)
Supplement: 41416_2021_1695_MOESM1_ESM.pdf [file 41416_2021_1695_MOESM1_ESM.pdf]

**Supplementary Table S1. Primers for RT-qPCR and bisulfite sequencing.**

| <b>Primer</b>  | <b>Sequence</b>                     | <b>Purpose</b>                |
|----------------|-------------------------------------|-------------------------------|
| GAPDH_Fw       | GGTGAAGGTCGGAGTCAACGGA              | RT-qPCR                       |
| GAPDH_Rv       | GAGGGATCTCGTCCTGGAAGA               | RT-qPCR                       |
| PRKCZ_Fw       | ACATGTGTCGTCTGCACCAG                | RT-qPCR                       |
| PRKCZ_Rv       | GTGCTCGGAAAAACATGAAT                | RT-qPCR                       |
| ATM_Fw         | CCGAGTGCAGTGACAGTG                  | RT-qPCR                       |
| ATM_Rv         | TTGACGGCAGCAGATAAGC                 | RT-qPCR                       |
| COL2A1_Fw      | CAAACTGCCAACGTCCAGAT                | RT-qPCR                       |
| COL2A1_Rv      | CTGCTTCGTCCAGATAGGCAAT              | RT-qPCR                       |
| ACAN_Fw        | AGGCAGCGTGATCCTTACC                 | RT-qPCR                       |
| ACAN_Rv        | GGCCTCTCCAGTCTCATTCTC               | RT-qPCR                       |
| PRKCZ_Fw       | AATTGGATCCAGGATTGGTTTAGGTG          | Targeted bisulfite sequencing |
| PRKCZ_Rv       | GGGGGAATTCAAAACTCCAAATAAAACC        | Targeted bisulfite sequencing |
| PRKCZ_cDNA1_Fw | TAGCTCTAGATGCCCAGCAGGACC            | Vector Construction           |
| PRKCZ_cDNA1_Rv | GTACGAATTCACACCGACTCCTCGGT          | Vector Construction           |
| PRKCZ_cDNA2_Fw | GCTTCGAATTCTGCAGATGCCCAGCAGGACCGGC  | Vector Construction           |
| PRKCZ_cDNA2_Rv | CGGGCCCGCGGTACCGCACACCGACTCCTCGGTGG | Vector Construction           |

Fw, Forward. Rv, Reverse. PRKCZ\_cDNA1 primers were inserted to pCDH-EF1-MCS-IRES-Puro. PRKCZ\_cDNA2 primers were inserted to pEGFP-N1-FLAG.

**Supplementary Table S2. Antibodies for western blotting.**

| <b>Antibody</b>     | <b>Dilution rate</b> | <b>Manufacturer</b>       | <b>Catalog number</b> |
|---------------------|----------------------|---------------------------|-----------------------|
| Actin               | 1:5000               | Millipore                 | MAB1501               |
| PRKCZ               | 1:500                | Sigma Aldrich             | HPA021851             |
| ATM                 | 1:1000               | Cell Signaling Technology | 2873                  |
| phospho-ATM (S1981) | 1:1000               | Cell Signaling Technology | 5883                  |
| CHK2                | 1:1000               | Cell Signaling Technology | 6334                  |
| phospho-CHK2(T68)   | 1:1000               | Cell Signaling Technology | 2197                  |
| MRE11               | 1:1000               | Cell Signaling Technology | 4874                  |
| RAD50               | 1:1000               | Cell Signaling Technology | 3427                  |
| NBS1                | 1:1000               | Cell Signaling Technology | 14956                 |
| cleaved caspase-3   | 1:500                | Cell Signaling Technology | 9661                  |
| cleaved PARP        | 1:500                | Promega                   | G7341                 |
| GFP                 | 1:1000               | Cell Signaling Technology | 2956                  |
| mouse IgG           | 1:5000               | Santa Cruz Biotechnology  | 2005                  |
| rabbit IgG          | 1:5000               | Santa Cruz Biotechnology  | 2004                  |

**Supplementary Table S3. Clinical demographics of chondrosarcoma samples.**

| Case | Diagnosis | Age | Gender | Location                      | Experiment   |
|------|-----------|-----|--------|-------------------------------|--------------|
| 1    | DDCS      | 59  | Male   | Pelvis                        | IHC          |
| 2    | DDCS      | 38  | Male   | Pelvis                        | IHC          |
| 3    | DDCS      | 53  | Female | Femur                         | IHC          |
| 4    | DDCS      | 71  | Male   | Pelvis                        | IHC          |
| 5    | DDCS      | 71  | Female | Mesentery of descending colon | IHC          |
| 6    | DDCS      | 59  | Male   | Humerus                       | IHC          |
| 7    | DDCS      | 54  | Female | Pelvis                        | IHC          |
| 8    | DDCS      | 71  | Male   | Femur                         | IHC          |
| 9    | DDCS      | 44  | Male   | Femur                         | IHC, RT-qPCR |
| 10   | DDCS      | 73  | Male   | Femur                         | IHC          |
| 11   | DDCS      | 38  | Female | Humerus                       | IHC          |
| 12   | DDCS      | 79  | Male   | Rib                           | IHC          |
| 13   | DDCS      | 56  | Male   | Femur                         | IHC          |
| 14   | DDCS      | 62  | Female | Femur                         | IHC          |
| 15   | DDCS      | 67  | Male   | Femur                         | IHC, RT-qPCR |
| 16   | DDCS      | 68  | Female | Femur                         | IHC          |
| 17   | DDCS      | 81  | Male   | Spine                         | IHC, RT-qPCR |
| 18   | CCS       | 42  | Female | Pelvis                        | RT-qPCR      |
| 19   | CCS       | 27  | Female | Scapula                       | RT-qPCR      |
| 20   | CCS       | 49  | Female | Pelvis                        | RT-qPCR      |
| 21   | CCS       | 22  | Male   | Scapula                       | RT-qPCR      |
| 22   | CCS       | 66  | Female | Femur                         | RT-qPCR      |
| 23   | CCS       | 89  | Female | Rib                           | RT-qPCR      |
| 24   | CCS       | 88  | Male   | Femur                         | RT-qPCR      |
| 25   | CCS       | 57  | Female | Spine                         | RT-qPCR      |
| 26   | CCS       | 33  | Male   | Pelvis                        | RT-qPCR      |

DDCS, dedifferentiated chondrosarcoma. CCS, conventional chondrosarcoma. IHC, immunohistochemistry. RT-qPCR, quantitative reverse transcription polymerase chain reaction.

**Supplementary Table S4. Detail data of whole-genome bisulfite sequence.**

| <b>Cell line</b> | <b>Total sequence pairs</b> | <b>Mapping efficiency</b> | <b>Total number of C's analysed</b> | <b>C methylated in CpG context</b> |
|------------------|-----------------------------|---------------------------|-------------------------------------|------------------------------------|
| NDCS-1           | 590,950,972                 | 47.5 %                    | 15,249,768,806                      | 57.2 %                             |
| OUMS-27          | 581,096,690                 | 49.9 %                    | 15,674,058,312                      | 63.6 %                             |



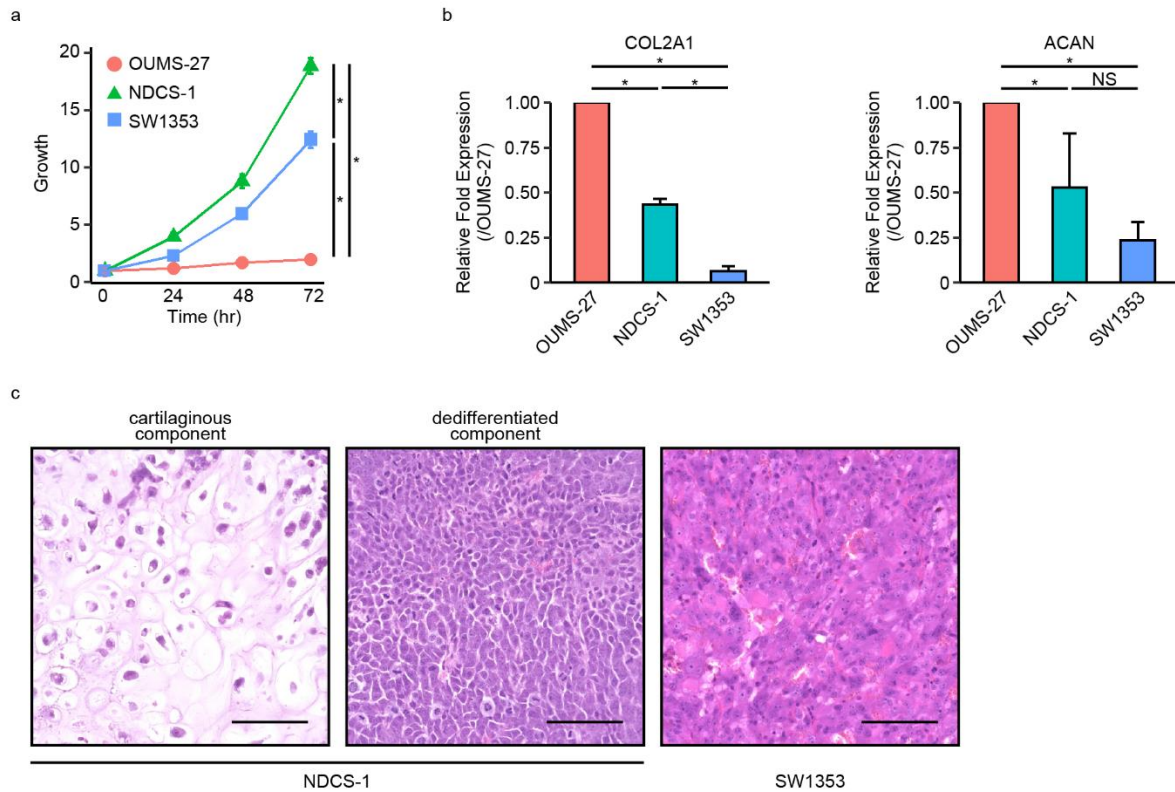

**Supplementary Figure S2. Phenotype of each cell line; OUMS-27, NDCS-1, and SW1353.** **a.** Proliferation assay. NDCS-1 and SW1353 showed relatively rapid growth compared to OUMS-27. **b.** Expression of chondrogenic differentiation-related genes determined by RT-qPCR. OUMS-27 expressed significantly higher level of chondrogenic differentiation-related genes than the others. **c.** Representative images of HE stains in xenografts of NDCS-1 and SW1353. The xenograft of SW1353 was close to dedifferentiated component rather than cartilaginous component of NDCS-1. Scale bars, 100  $\mu$ m. In **a** and **b**, the data are means  $\pm$  SD; n = 3. Two-tailed t tests. \*, p < 0.05. NS, not significant.

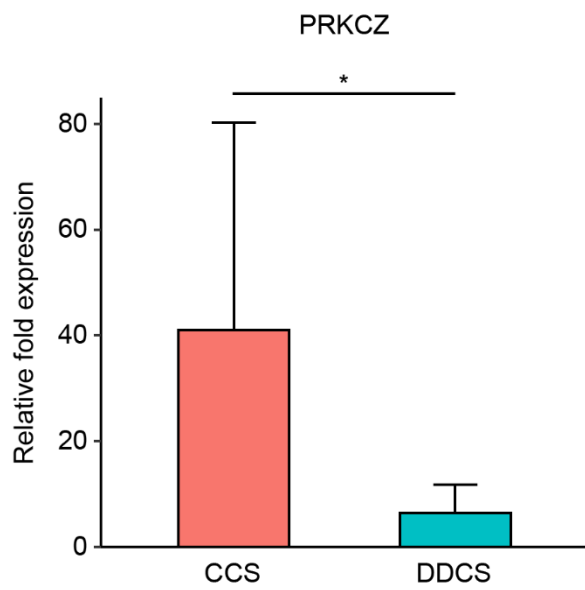

**Supplementary Figure S3. Comparison of PRKCZ expression levels in clinical samples.** Nine samples of CCS and three samples of DDCS were analyzed by RT-qPCR. The relative fold expression was calculated based on the lowest expression level among all samples. Two-tailed t tests. \*,  $p < 0.05$ .

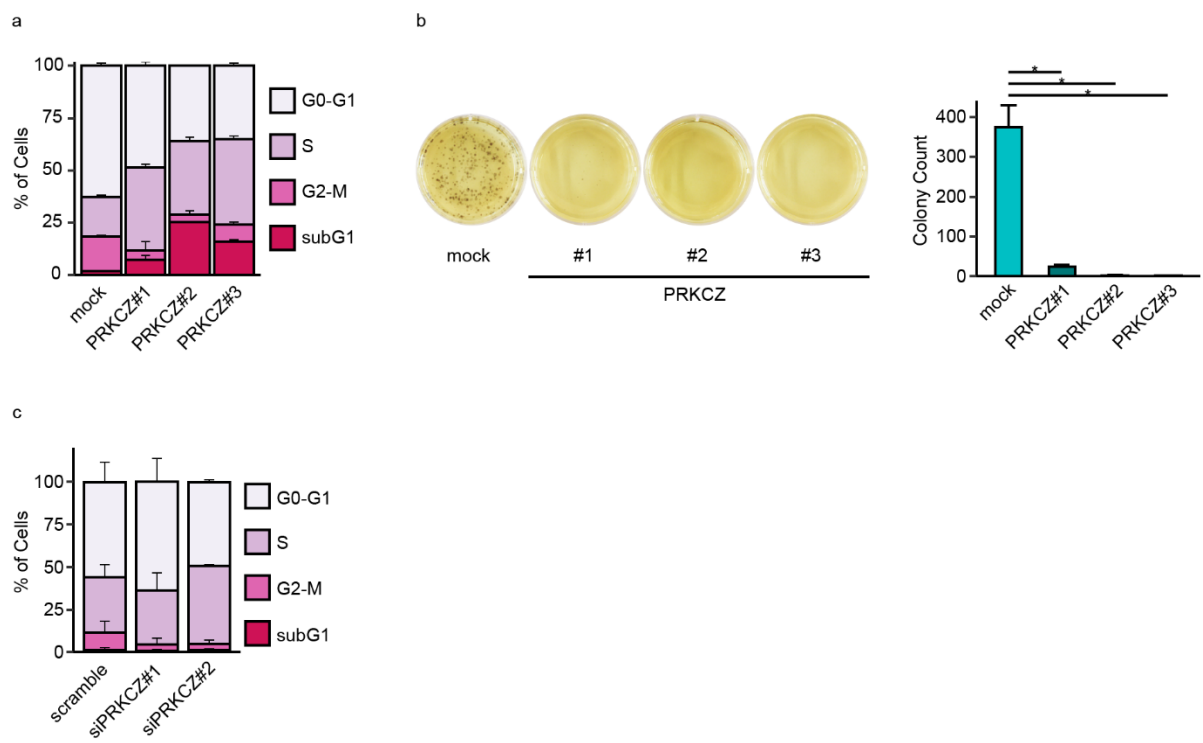

**Supplementary Figure S4. Additional data for Figure 4. a.** Cell cycle profiles in PRKCZ-overexpressing NDCS-1 vs. mock-transfected NDCS-1. **b.** Colony counts in PRKCZ-overexpressing NDCS-1 vs. mock-transfected NDCS-1, as determined by colony formation assay. Representative images are shown. Two-tailed t tests. \*,  $p < 0.05$ . **c.** Cell cycle profiles in siPRKCZ-transfected OUMS-27 vs. scrambled siRNA-transfected OUMS-27.



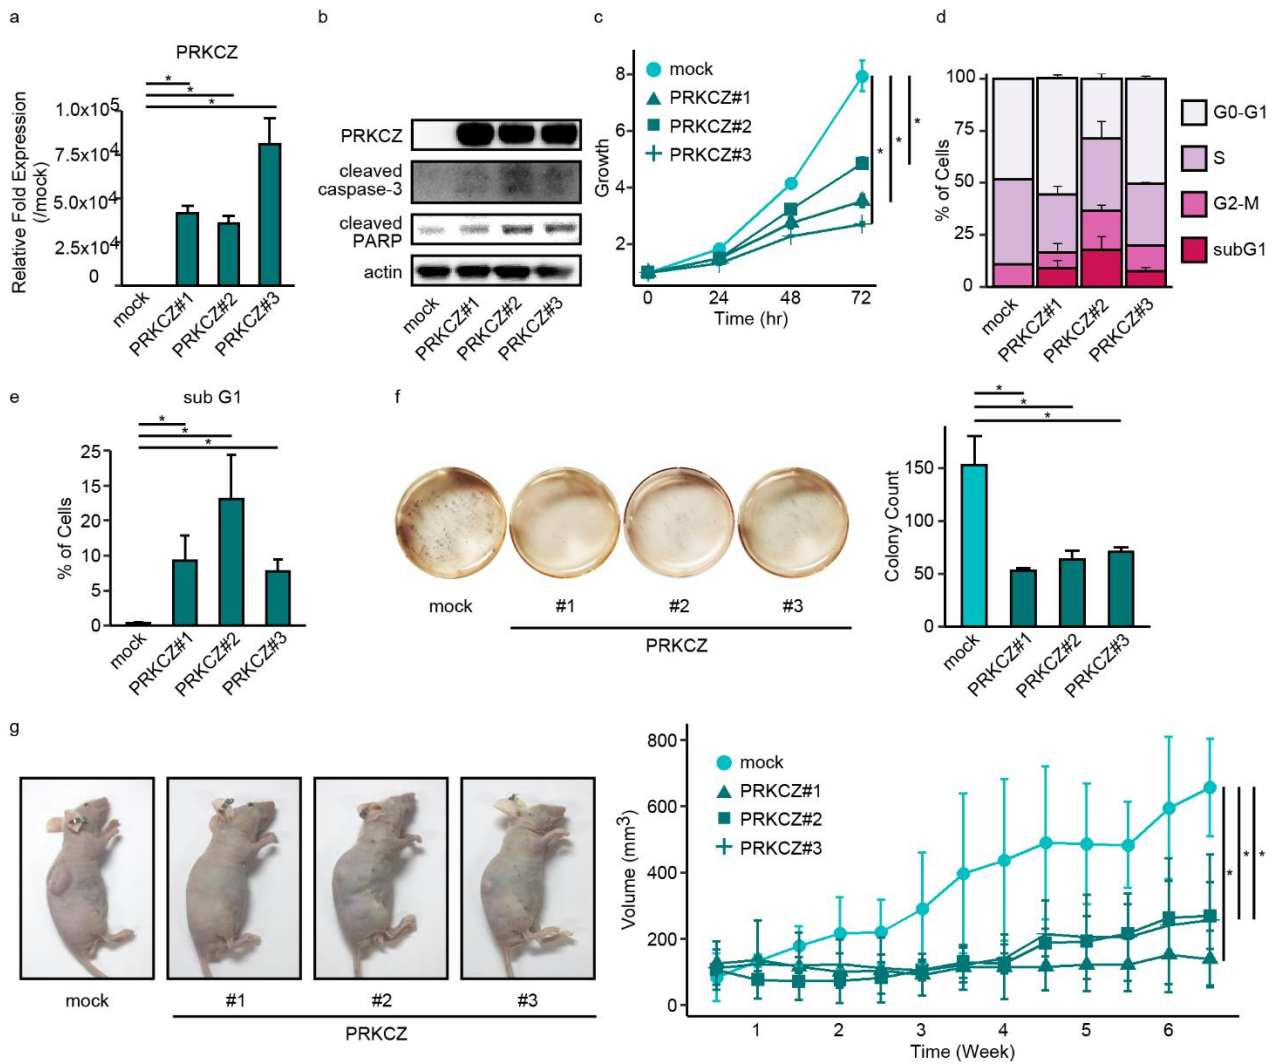

**Supplementary Figure S5. PRKCZ overexpression decreases proliferation and induces apoptosis in SW1353.** In **a–g**, PRKCZ–overexpressing SW1353 vs. mock–transfected SW1353. **a**. PRKCZ expression determined by RT–qPCR. **b**. PRKCZ and apoptosis–related proteins expression determined by western blotting. **c**. Proliferation assay. **d** and **e**. Cell cycle profiles, and sub G1 fraction rate determined by cell cycle assay. **f**. Colony counts determined by colony formation assay. Representative images are shown. **g**. Time course of tumor volume of xenograft transplantation. Images were obtained at the time of sacrifice; representative images are shown. In **a**, **c**, **e**, **f**, and **g**, data are means  $\pm$  SD;  $n = 3$ . Two–tailed t tests. \*,  $p < 0.05$ .

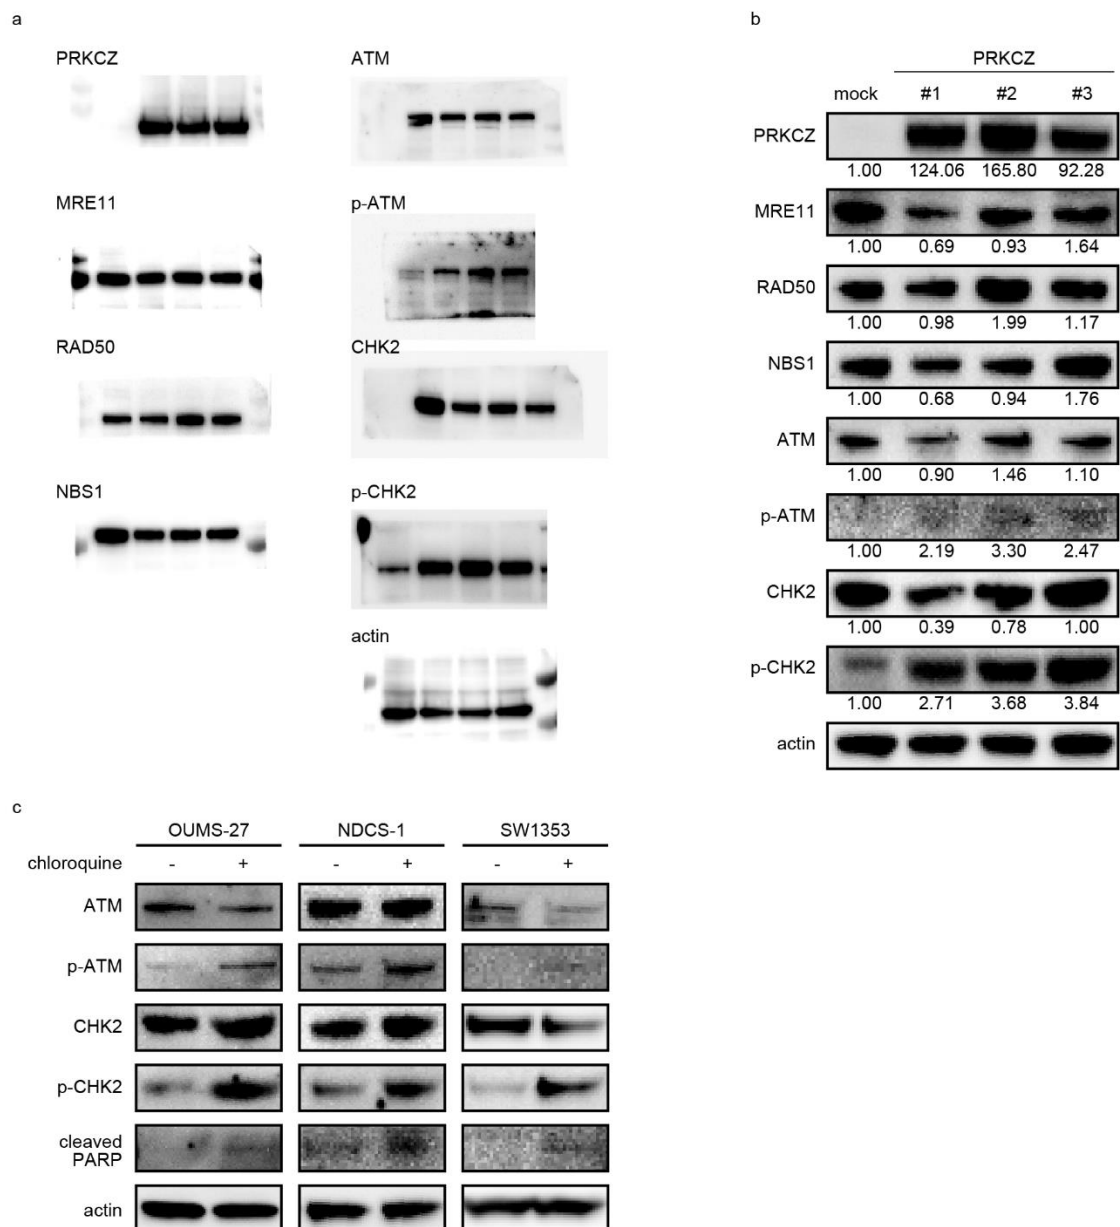

**Supplementary Figure S6. Validation for relationship between PRKCZ expression and ATM/CHK2 activation. a.** The original images of western blotting shown in Figure 5b. **b.** Expression of ATM/CHK2-related proteins in PRKCZ-overexpressing SW1353 vs. mock-transfected SW1353. Band intensities were quantified and normalized using actin levels. The relative intensities compared to mock are shown under each band. **c.** Expression of ATM/CHK2-related proteins and apoptosis-related protein in chloroquine-treated each cell line.

a

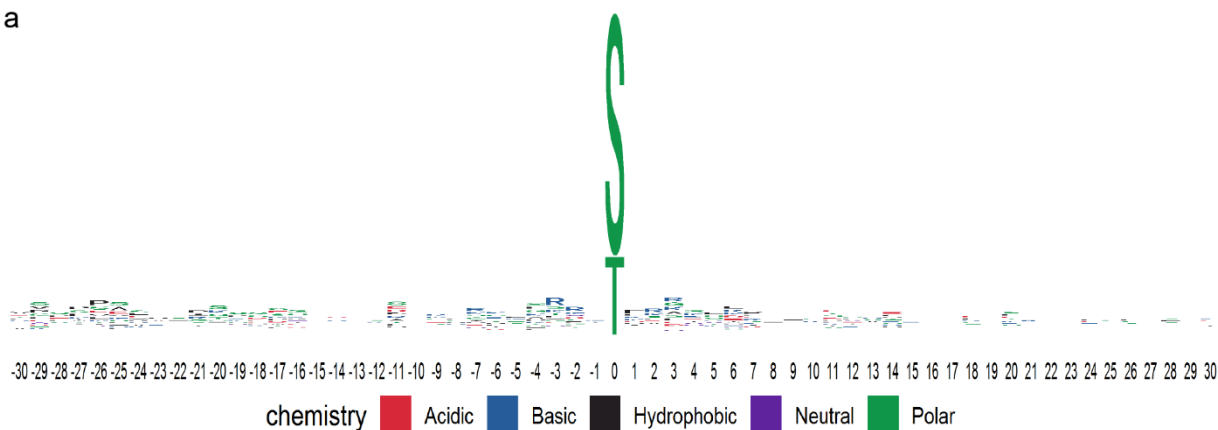

b

ATM

| Position | Code | Kinase             | Peptide          | Score  | Cutoff |
|----------|------|--------------------|------------------|--------|--------|
| 21       | T    | AGC/PKC/PKCi/PRKCZ | QLEHDRATERKKEVE  | 51.196 | 41.793 |
| 47       | S    | AGC/PKC/PKCi/PRKCZ | IKHLDRHSDSKQGKY  | 45.588 | 41.793 |
| 474      | S    | AGC/PKC/PKCi/PRKCZ | DKRSNLESSQKSDLL  | 43.131 | 41.793 |
| 571      | S    | AGC/PKC/PKCi/PRKCZ | CEVNRSFSLKESIMK  | 44.304 | 41.793 |
| 1306     | S    | AGC/PKC/PKCi/PRKCZ | AYEGTRDSGMAQQRE  | 50.485 | 41.793 |
| 1635     | S    | AGC/PKC/PKCi/PRKCZ | MVDIMRASQDNPQDG  | 47.287 | 41.793 |
| 1695     | S    | AGC/PKC/PKCi/PRKCZ | IQHSDKASYTEKALKL | 45.944 | 41.793 |
| 2114     | S    | AGC/PKC/PKCi/PRKCZ | MQWDHCTSVSKEVEG  | 44.723 | 41.793 |
| 2549     | S    | AGC/PKC/PKCi/PRKCZ | NNLISRISMDHPHHT  | 47.727 | 41.793 |

CHK2

| Position | Code | Kinase | Peptide | Score | Cutoff |
|----------|------|--------|---------|-------|--------|
|----------|------|--------|---------|-------|--------|

No site was predicted

RAD50

| Position | Code | Kinase | Peptide | Score | Cutoff |
|----------|------|--------|---------|-------|--------|
|----------|------|--------|---------|-------|--------|

No site was predicted

**Supplementary Figure S7. Group-based phosphorylation site prediction system (<http://gps.biocuckoo.cn>) identified predicted phosphorylation sites of PRKCZ. a. Sequence logo of PRKCZ. b. Predicted phosphorylation sites of ATM, CHK2, and RAD50. CHK2 and RAD50 have no predicted phosphorylation sites.**

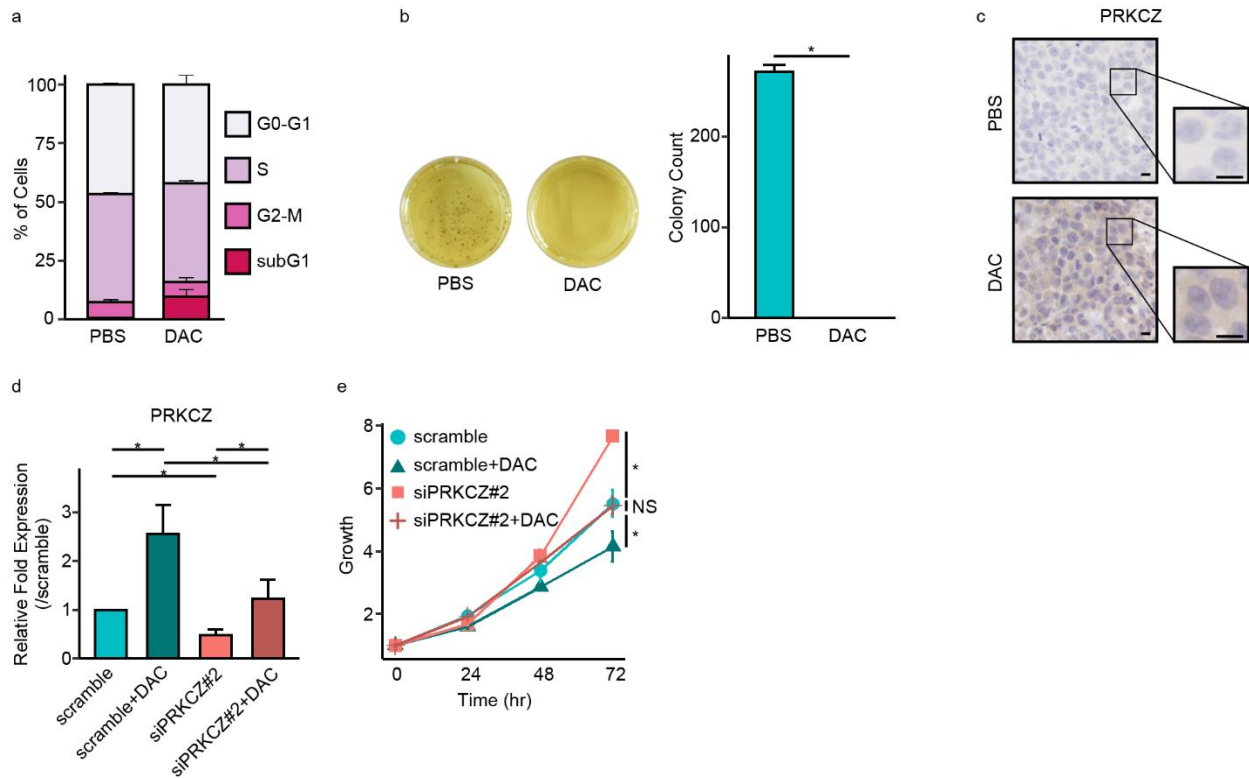

**Supplementary Figure S8. Additional data for Figure 6.** **a.** Cell cycle profiles in 10 $\mu$ M of decitabine–treated NDCS–1 vs. PBS–treated NDCS–1. **b.** Colony counts in 10 $\mu$ M of decitabine–treated NDCS–1 vs. PBS–treated NDCS–1, as determined by colony formation assay. Representative images are shown. **c.** Representative images of PRKCZ IHC staining in xenograft. Scale bars, 10  $\mu$ m. **d.** PRKCZ expression determined by RT–qPCR. **e.** Proliferation assay. In **b**, **d**, and **e**, data are means  $\pm$  SD; n = 3. Two–tailed t tests. \*, p < 0.05. NS, not significant. DAC, decitabine.

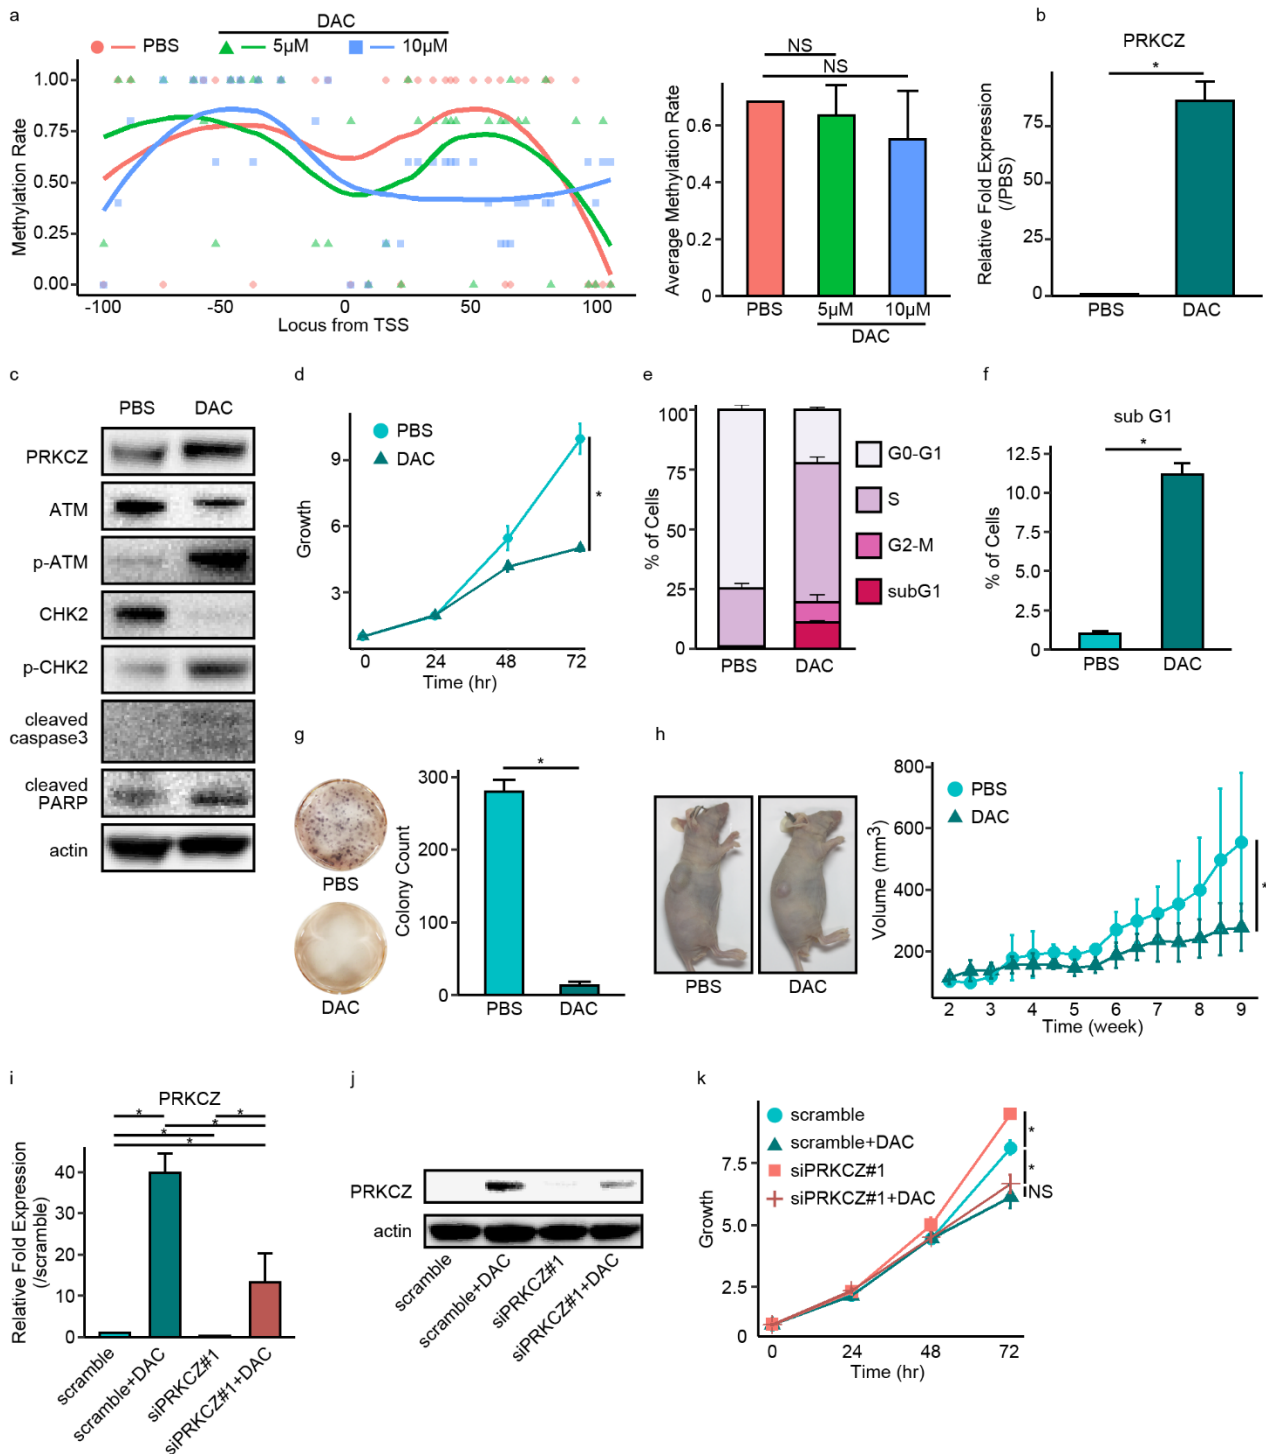

**Supplementary Figure S9. Decitabine increases PRKCZ expression and induces apoptosis in SW1353.** **a.** DNA methylation levels on the *PRKCZ* promoter in decitabine-treated vs. PBS-treated SW1353, as determined by bisulfite sequencing. Methylation rates of each C in CpG islands are indicated by dots (**left**). Curved lines indicate smooth local regression of methylation rates in each group (**left**). Average methylation rates (**right**).  $n = 5$ . Decitabine above 10 $\mu$ M was not administered because of cytotoxicity. In **b-g**, 10 $\mu$ M of decitabine-treated SW1353 vs. PBS-treated SW1353. **b.** *PRKCZ* expression determined by RT-qPCR. **c.** Expression of ATM/CHK2-related proteins and apoptosis-related proteins determined by western blotting. **d.** Proliferation assay. **e** and **f.** Cell cycle profiles, and sub G1 fraction rate

determined by cell cycle assay. **g.** Colony counts determined by colony formation assay. Representative images are shown. **h.** Time course of tumor volume of xenografts in decitabine-treated SW1353 vs. PBS-treated SW1353. Images were obtained at the time of sacrifice; representative images are shown.  $n = 5$ . In **i–k**, 10 $\mu$ M of decitabine-treated SW1353 with or without siPRKCZ. **i.** PRKCZ expression determined by RT-qPCR. **j.** PRKCZ expression determined by western blotting. **j.** Proliferation assay. In **b, d, f, g, i,** and **k**,  $n = 3$ . In **a, b, d, f–i,** and **k**, data are means  $\pm$  SD. Two-tailed t tests. \*,  $p < 0.05$ . NS, not significant. DAC, decitabine.

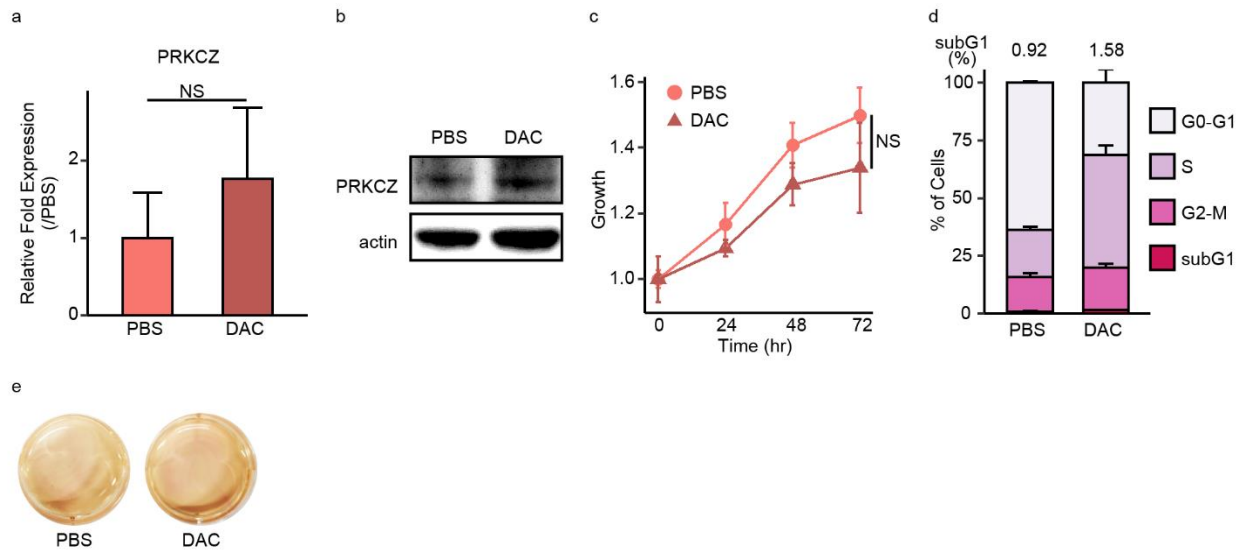

**Supplementary Figure S10. Decitabine does not inhibit proliferation of OUMS-27.** In **a–e**, decitabine-treated OUMS-27 vs. PBS-treated OUMS-27. **a**. PRKCZ expression determined by RT–qPCR. **b**. PRKCZ expression determined by western blotting. **c**. Proliferation assay. **d**. Cell cycle profiles. **e**. Colony formation assays showed no colonies in decitabine–treated or PBS–treated OUMS-27. Representative images are shown. In **a** and **c**, the data are means  $\pm$  SD;  $n = 3$ . Two–tailed  $t$  tests. NS, not significant. DAC, decitabine.

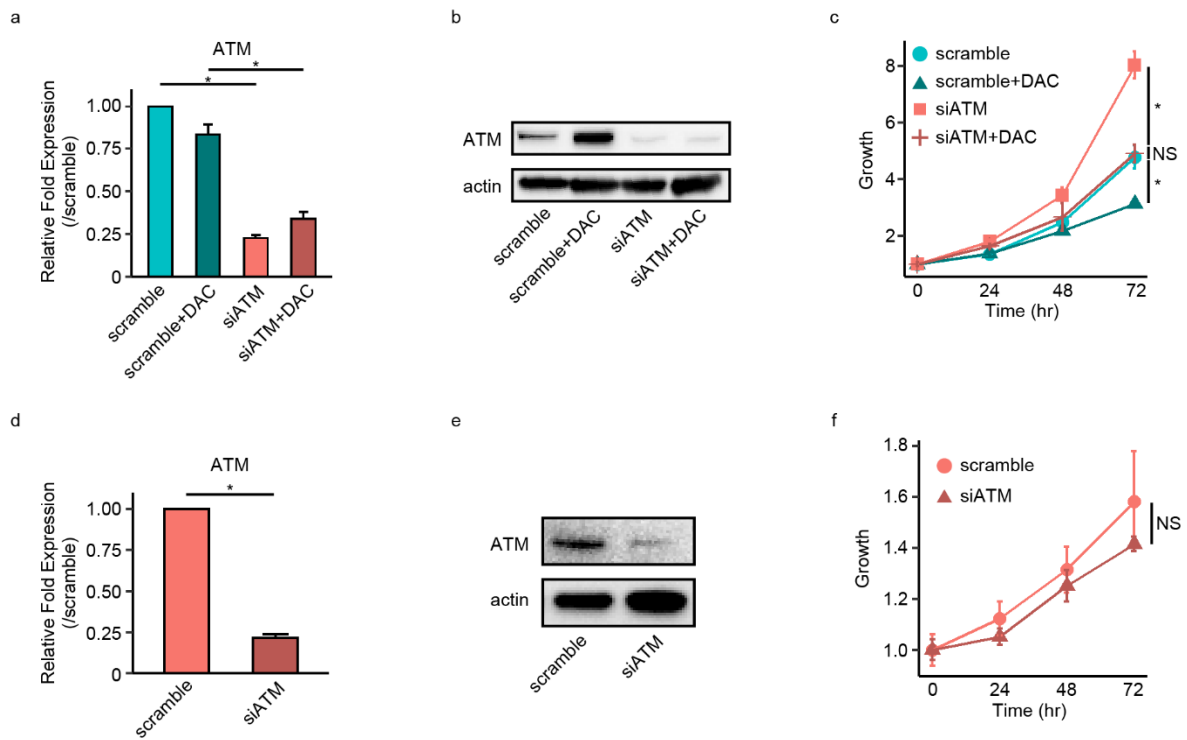

**Supplementary Figure S11. ATM knockdown increases proliferation in NDCS-1 but not in OUMS-27.** In **a-c**, 10 $\mu$ M of decitabine-treated NDCS-1 with or without siATM. **a**. ATM expression determined by RT-qPCR. **b**. ATM expression determined by western blotting. **c**. Proliferation assay. In **d-f**, siATM-transfected OUMS-27 vs. scrambled siRNA-transfected OUMS-27. **d**. ATM expression determined by RT-qPCR. **e**. ATM expression determined by western blotting. **f**. Proliferation assay. In **a**, **c**, **d**, and **f**, the data are means  $\pm$  SD;  $n = 3$ . Two-tailed  $t$  tests. NS, not significant. DAC, decitabine.
